# Supplementary material for: SOAPnuke: a MapReduce acceleration-supported software for integrated quality control and preprocessing of high-throughput sequencing data
Source: Oxford University Press journal article supplement (doi:10.1093/gigascience/gix120), 2017-12-04

Filter module

Preprocessing

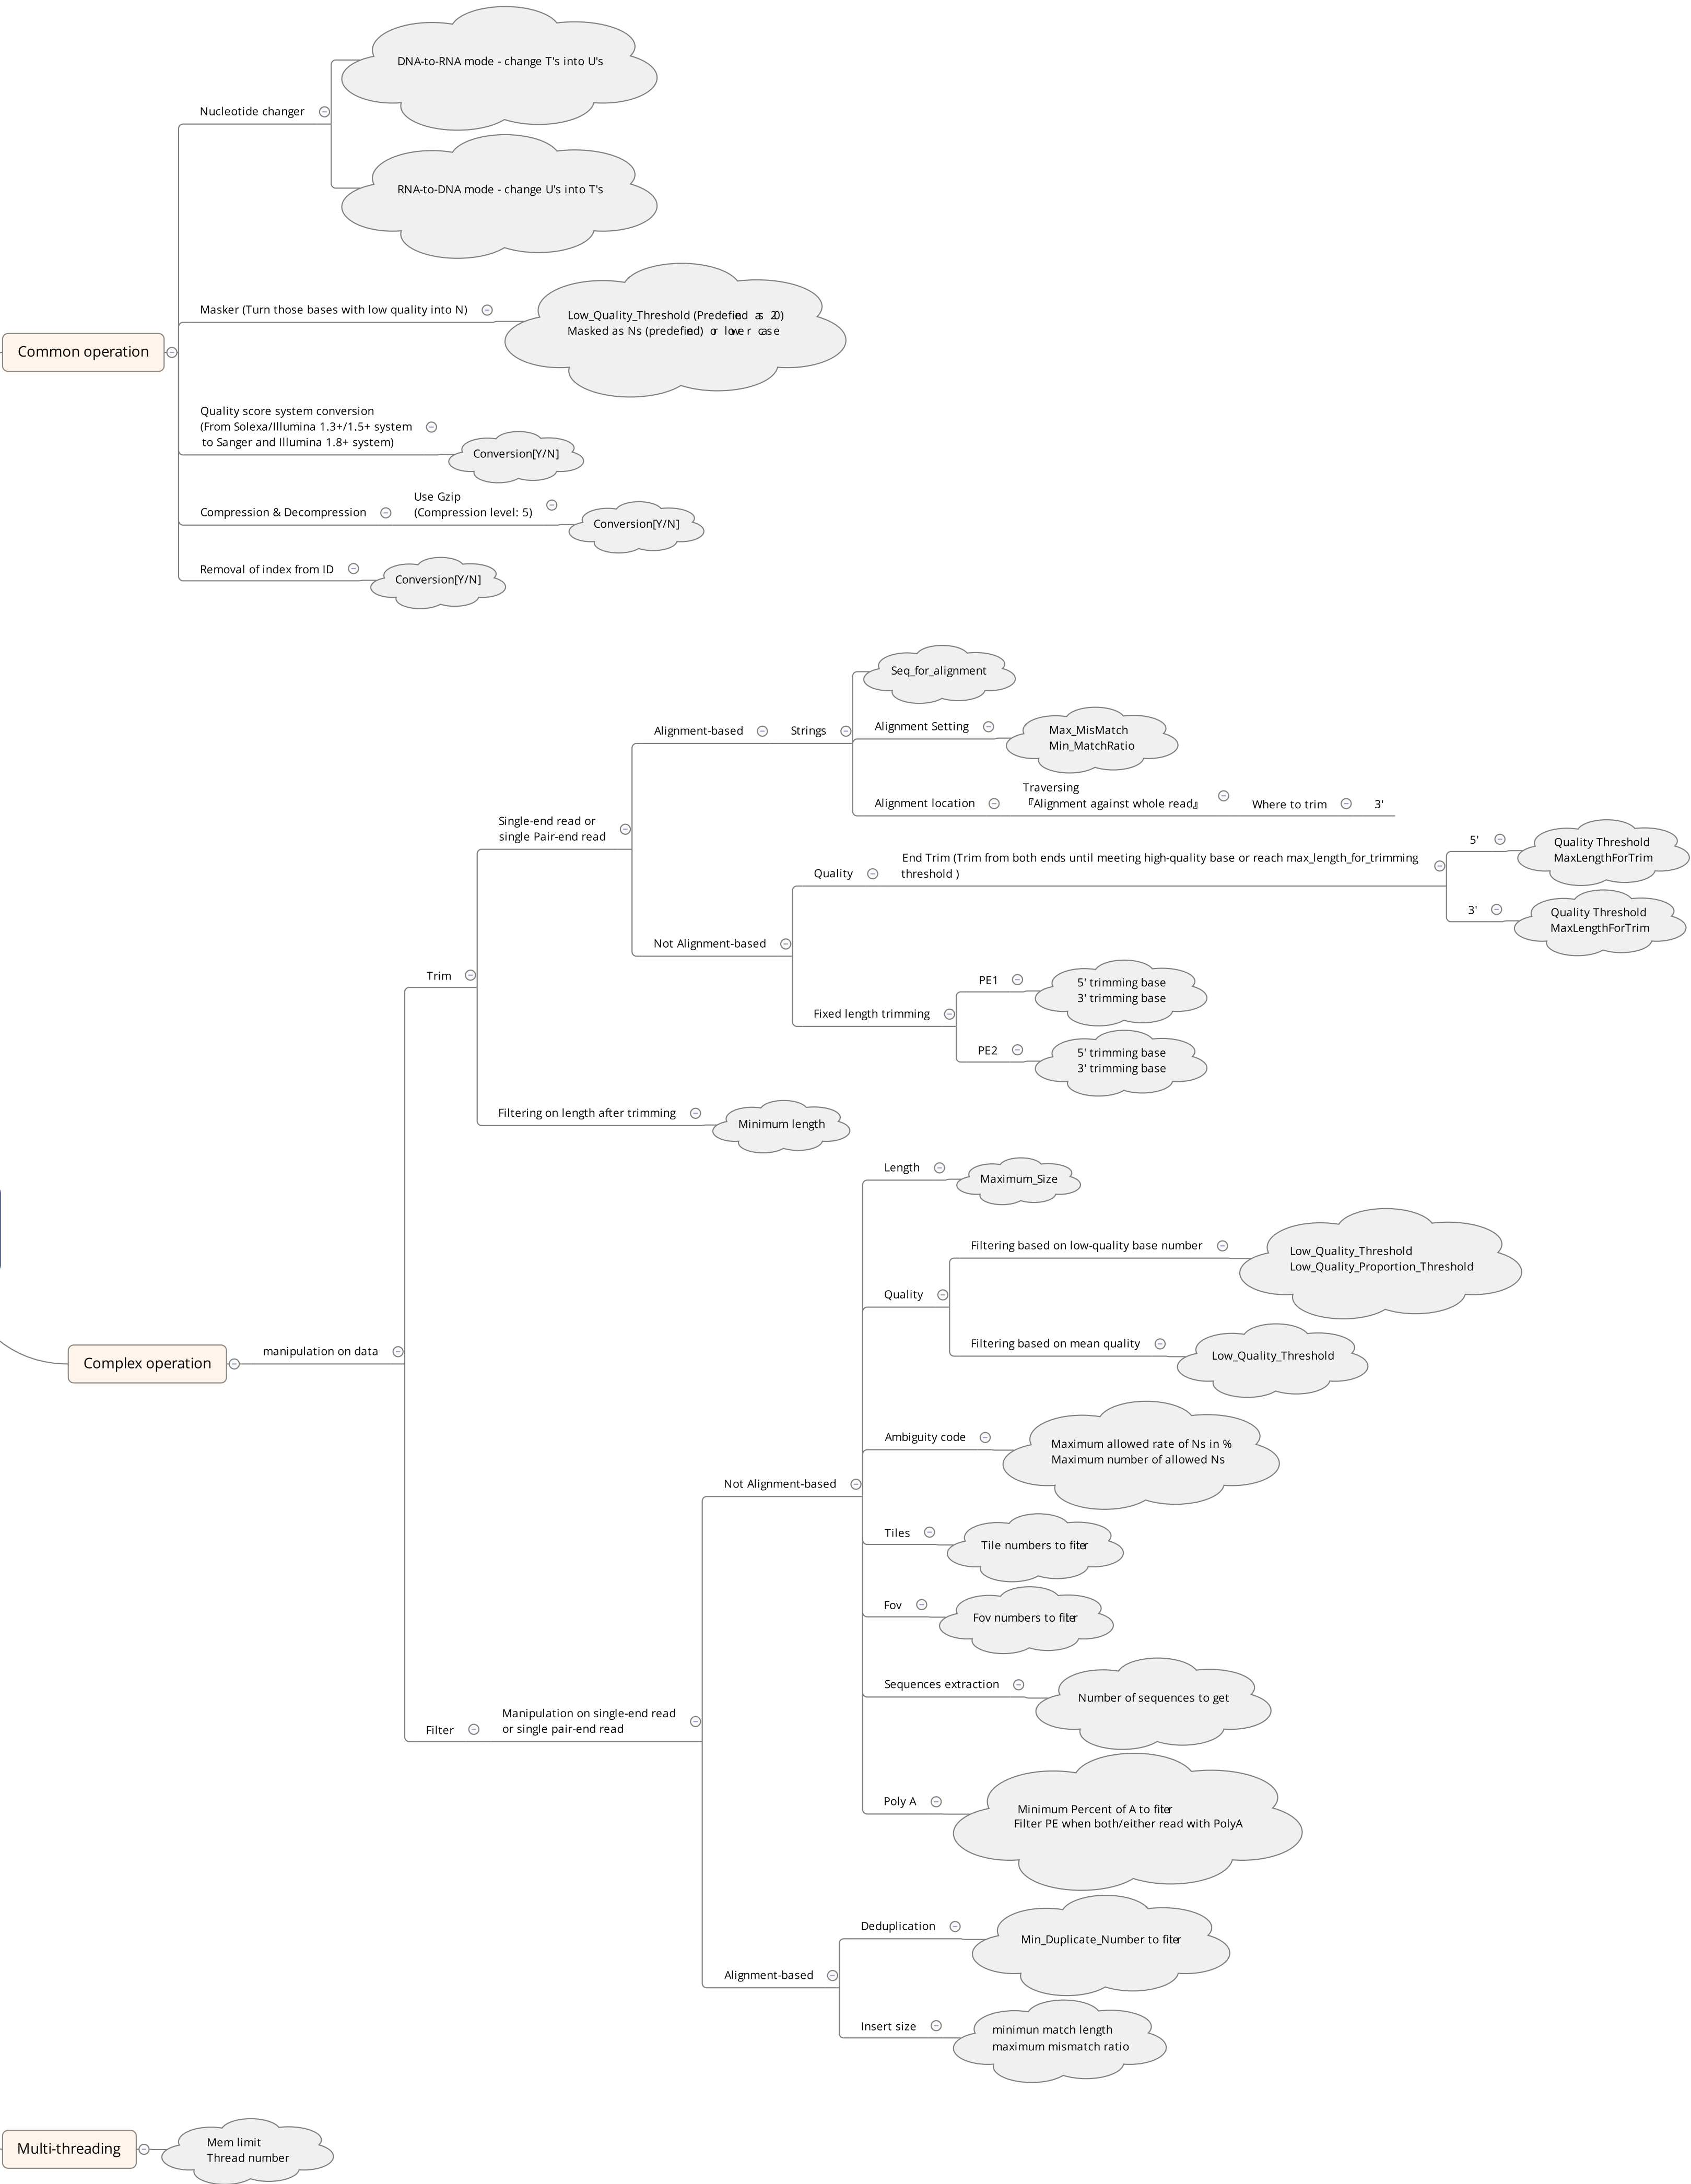

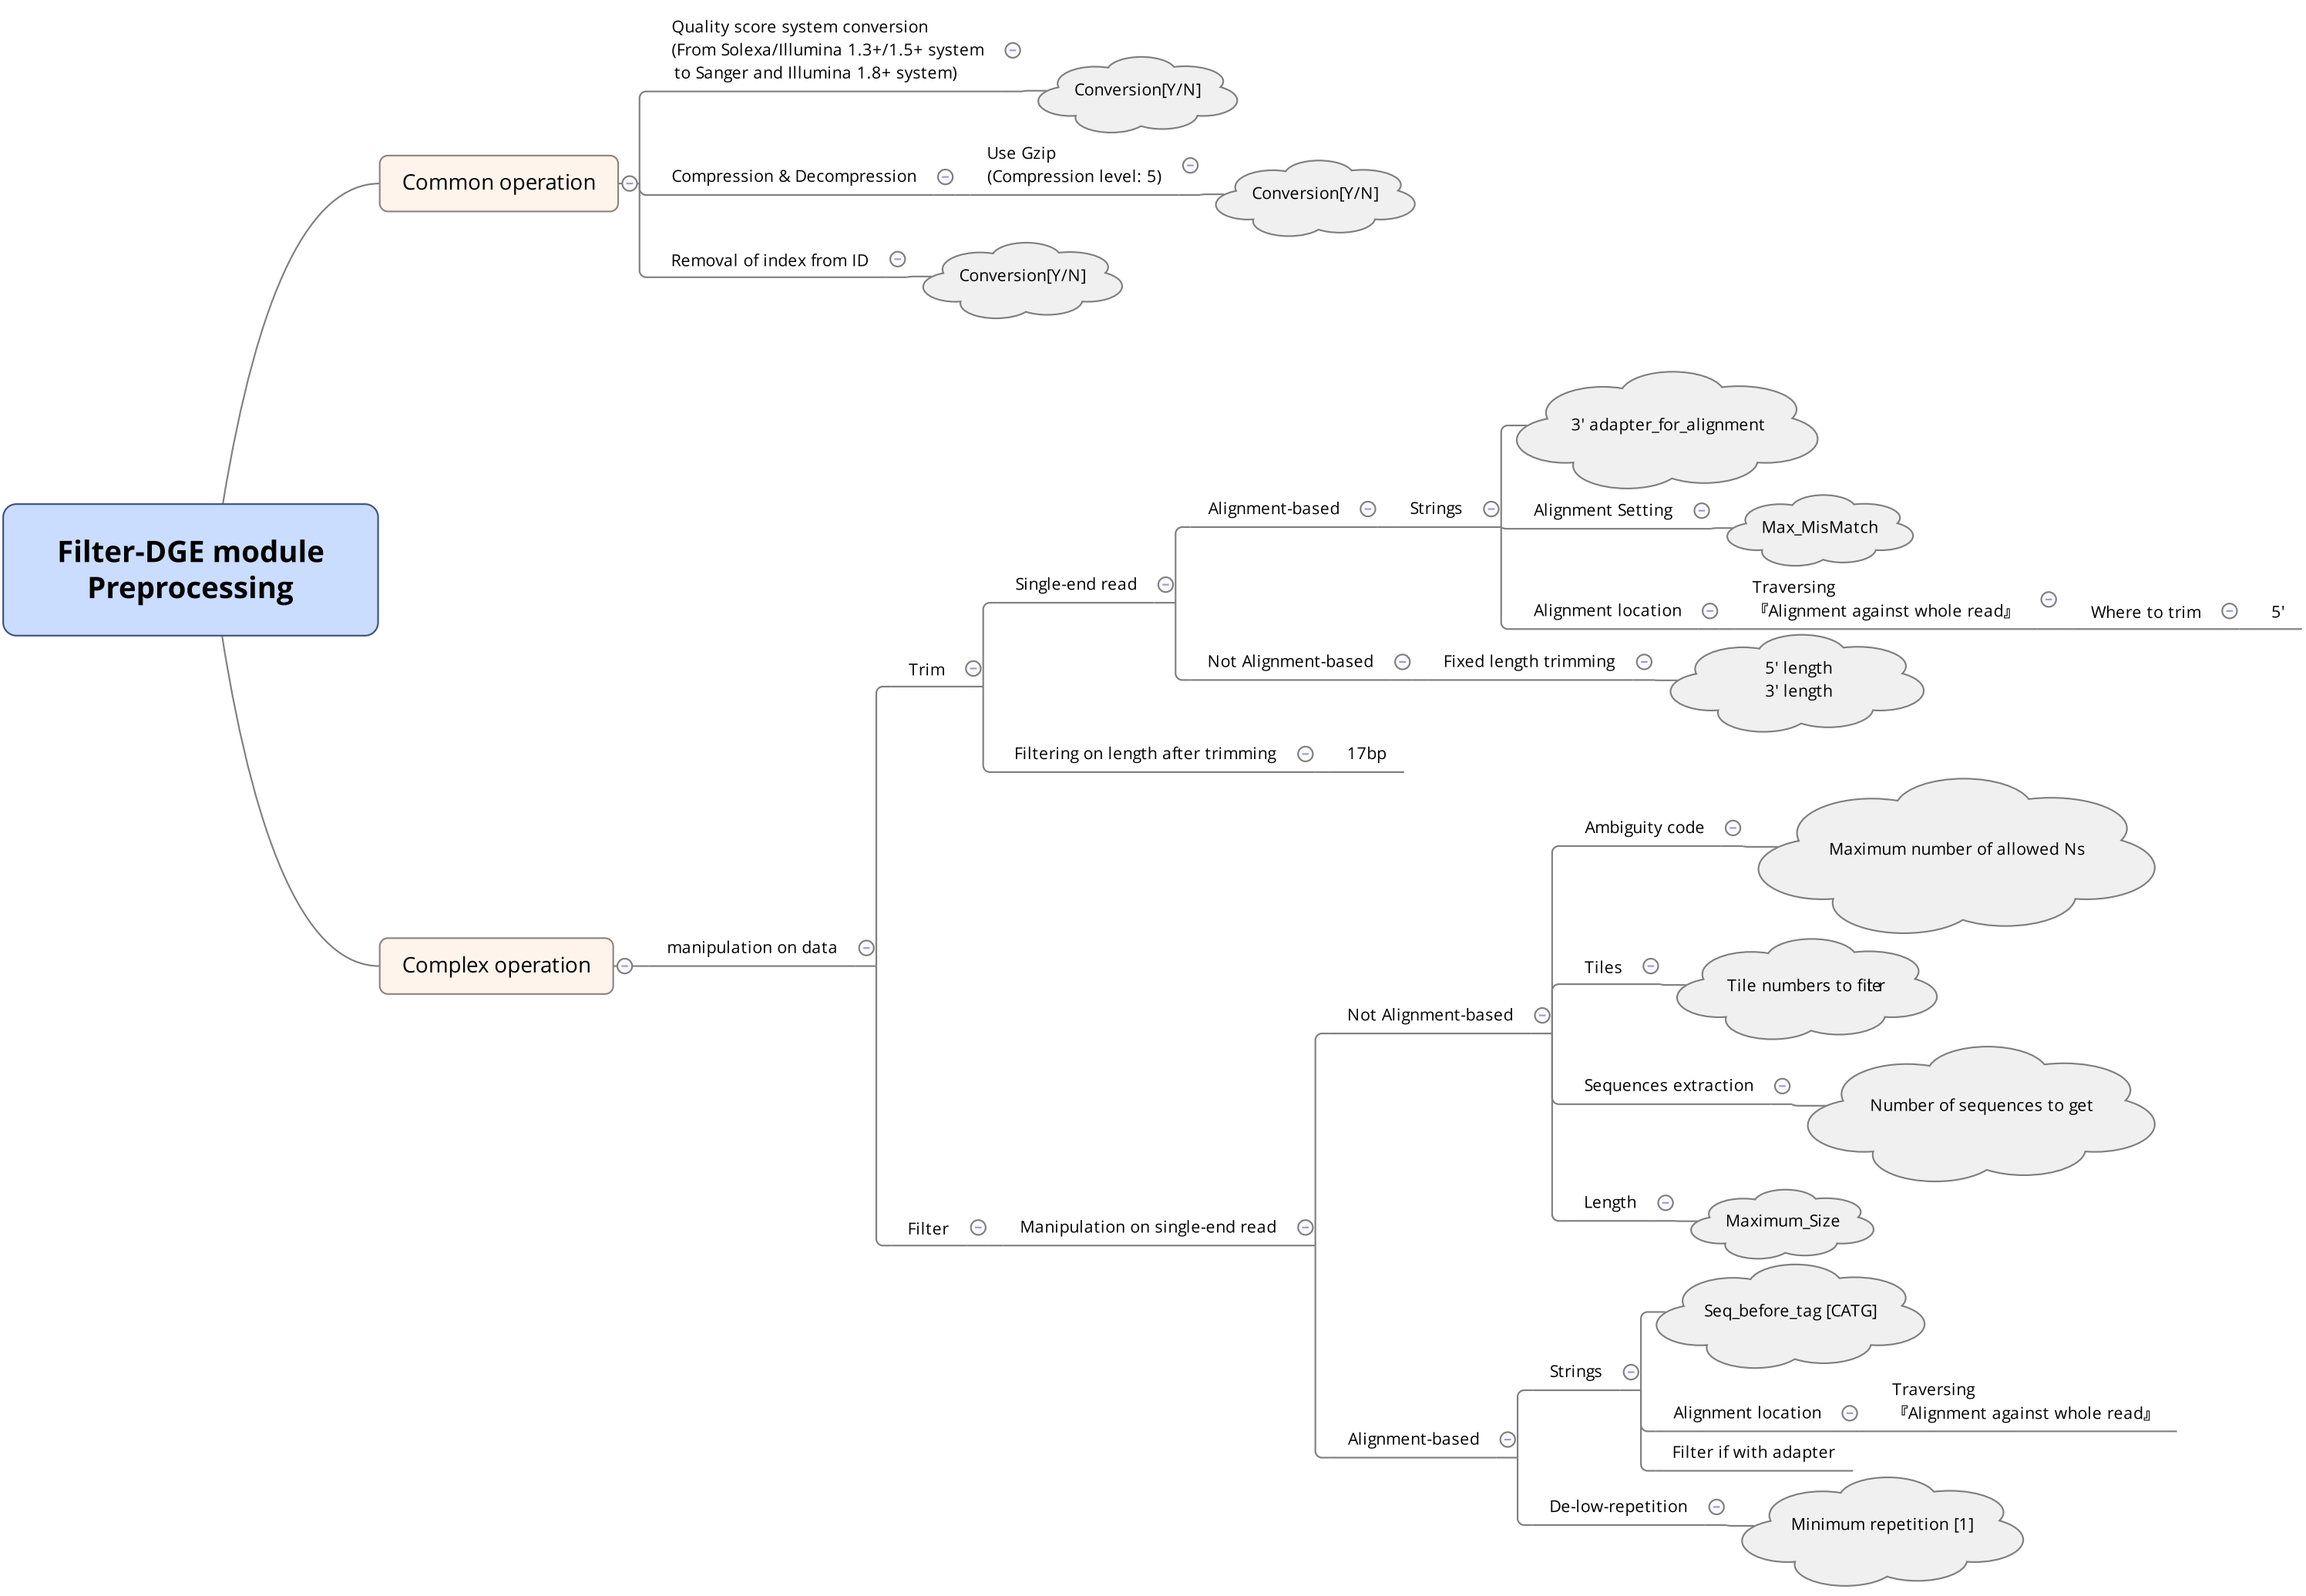

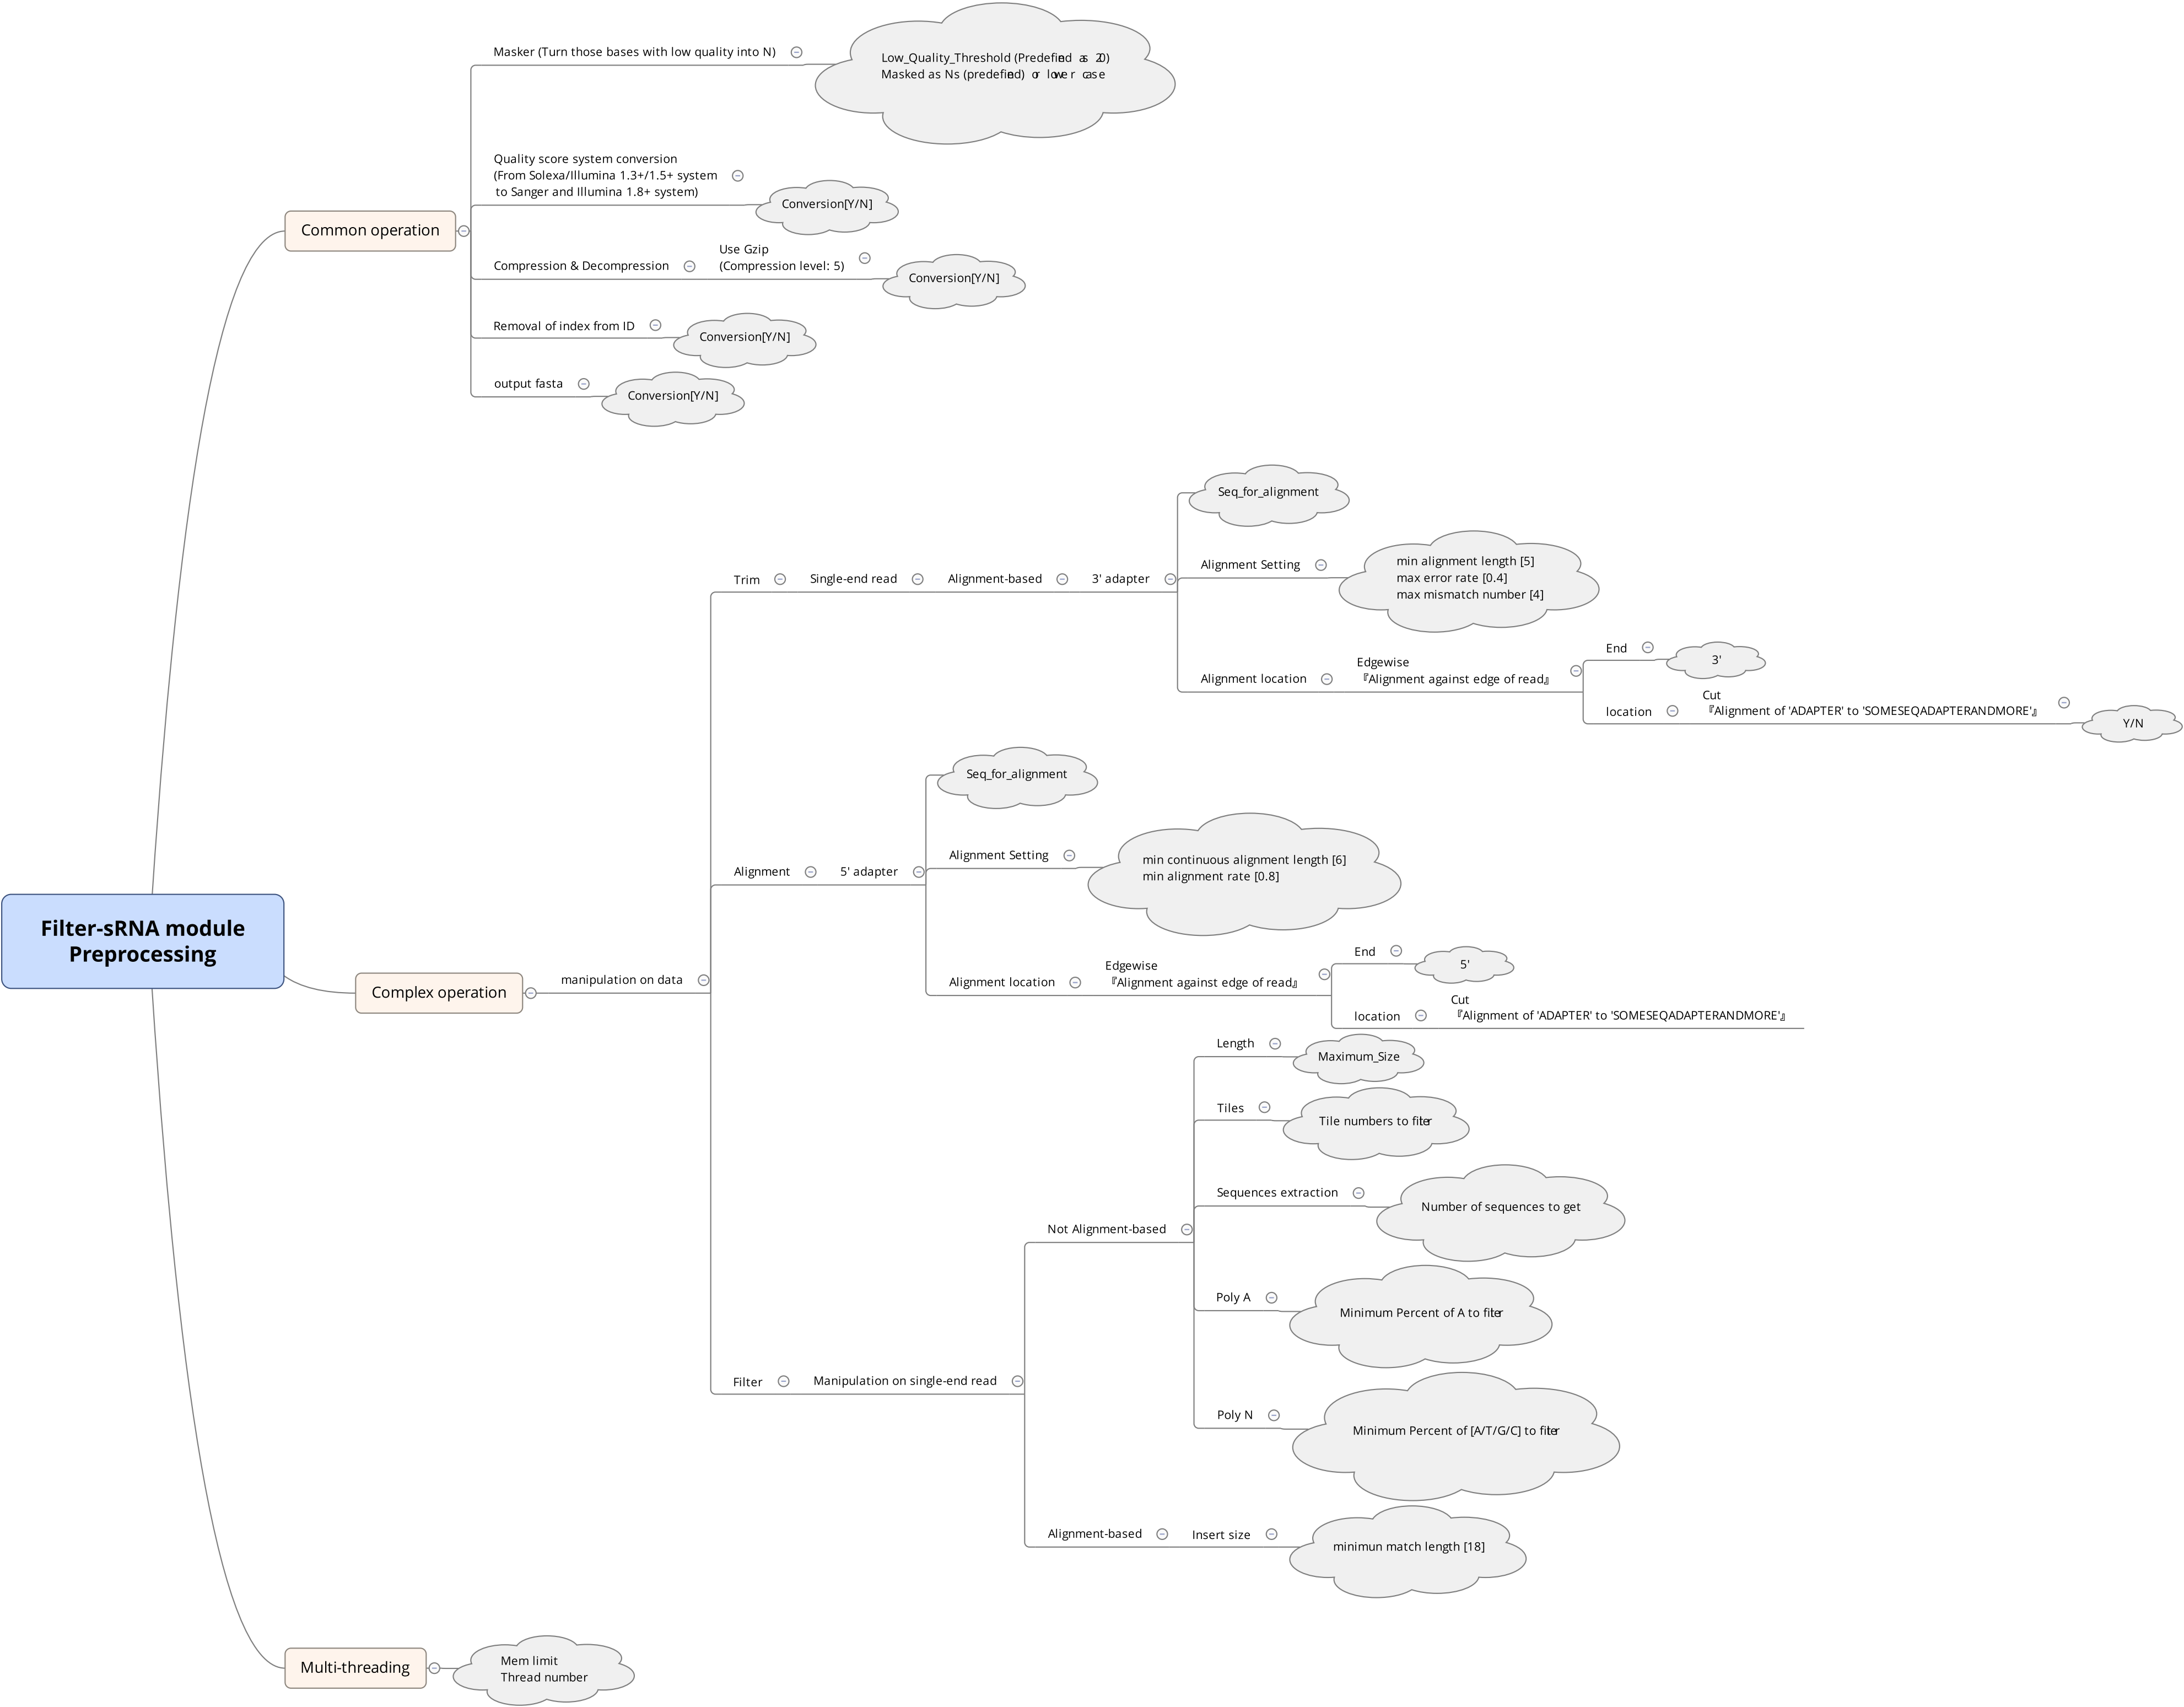

Filter-meta module  
Preprocessing

Common operation

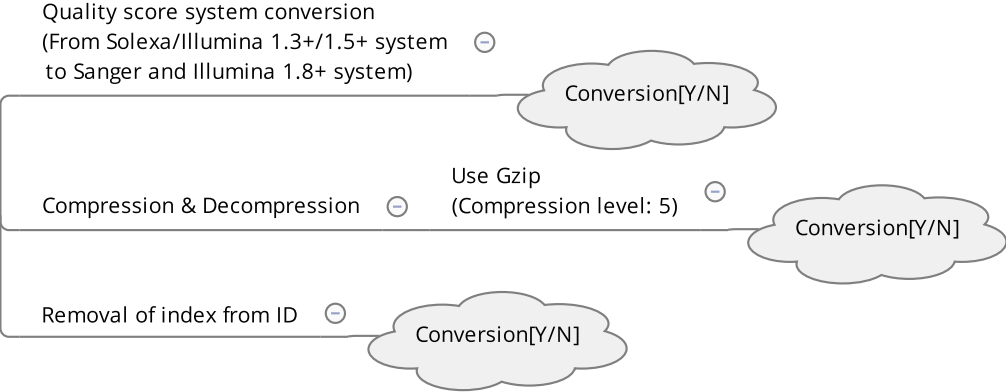

Complex operation

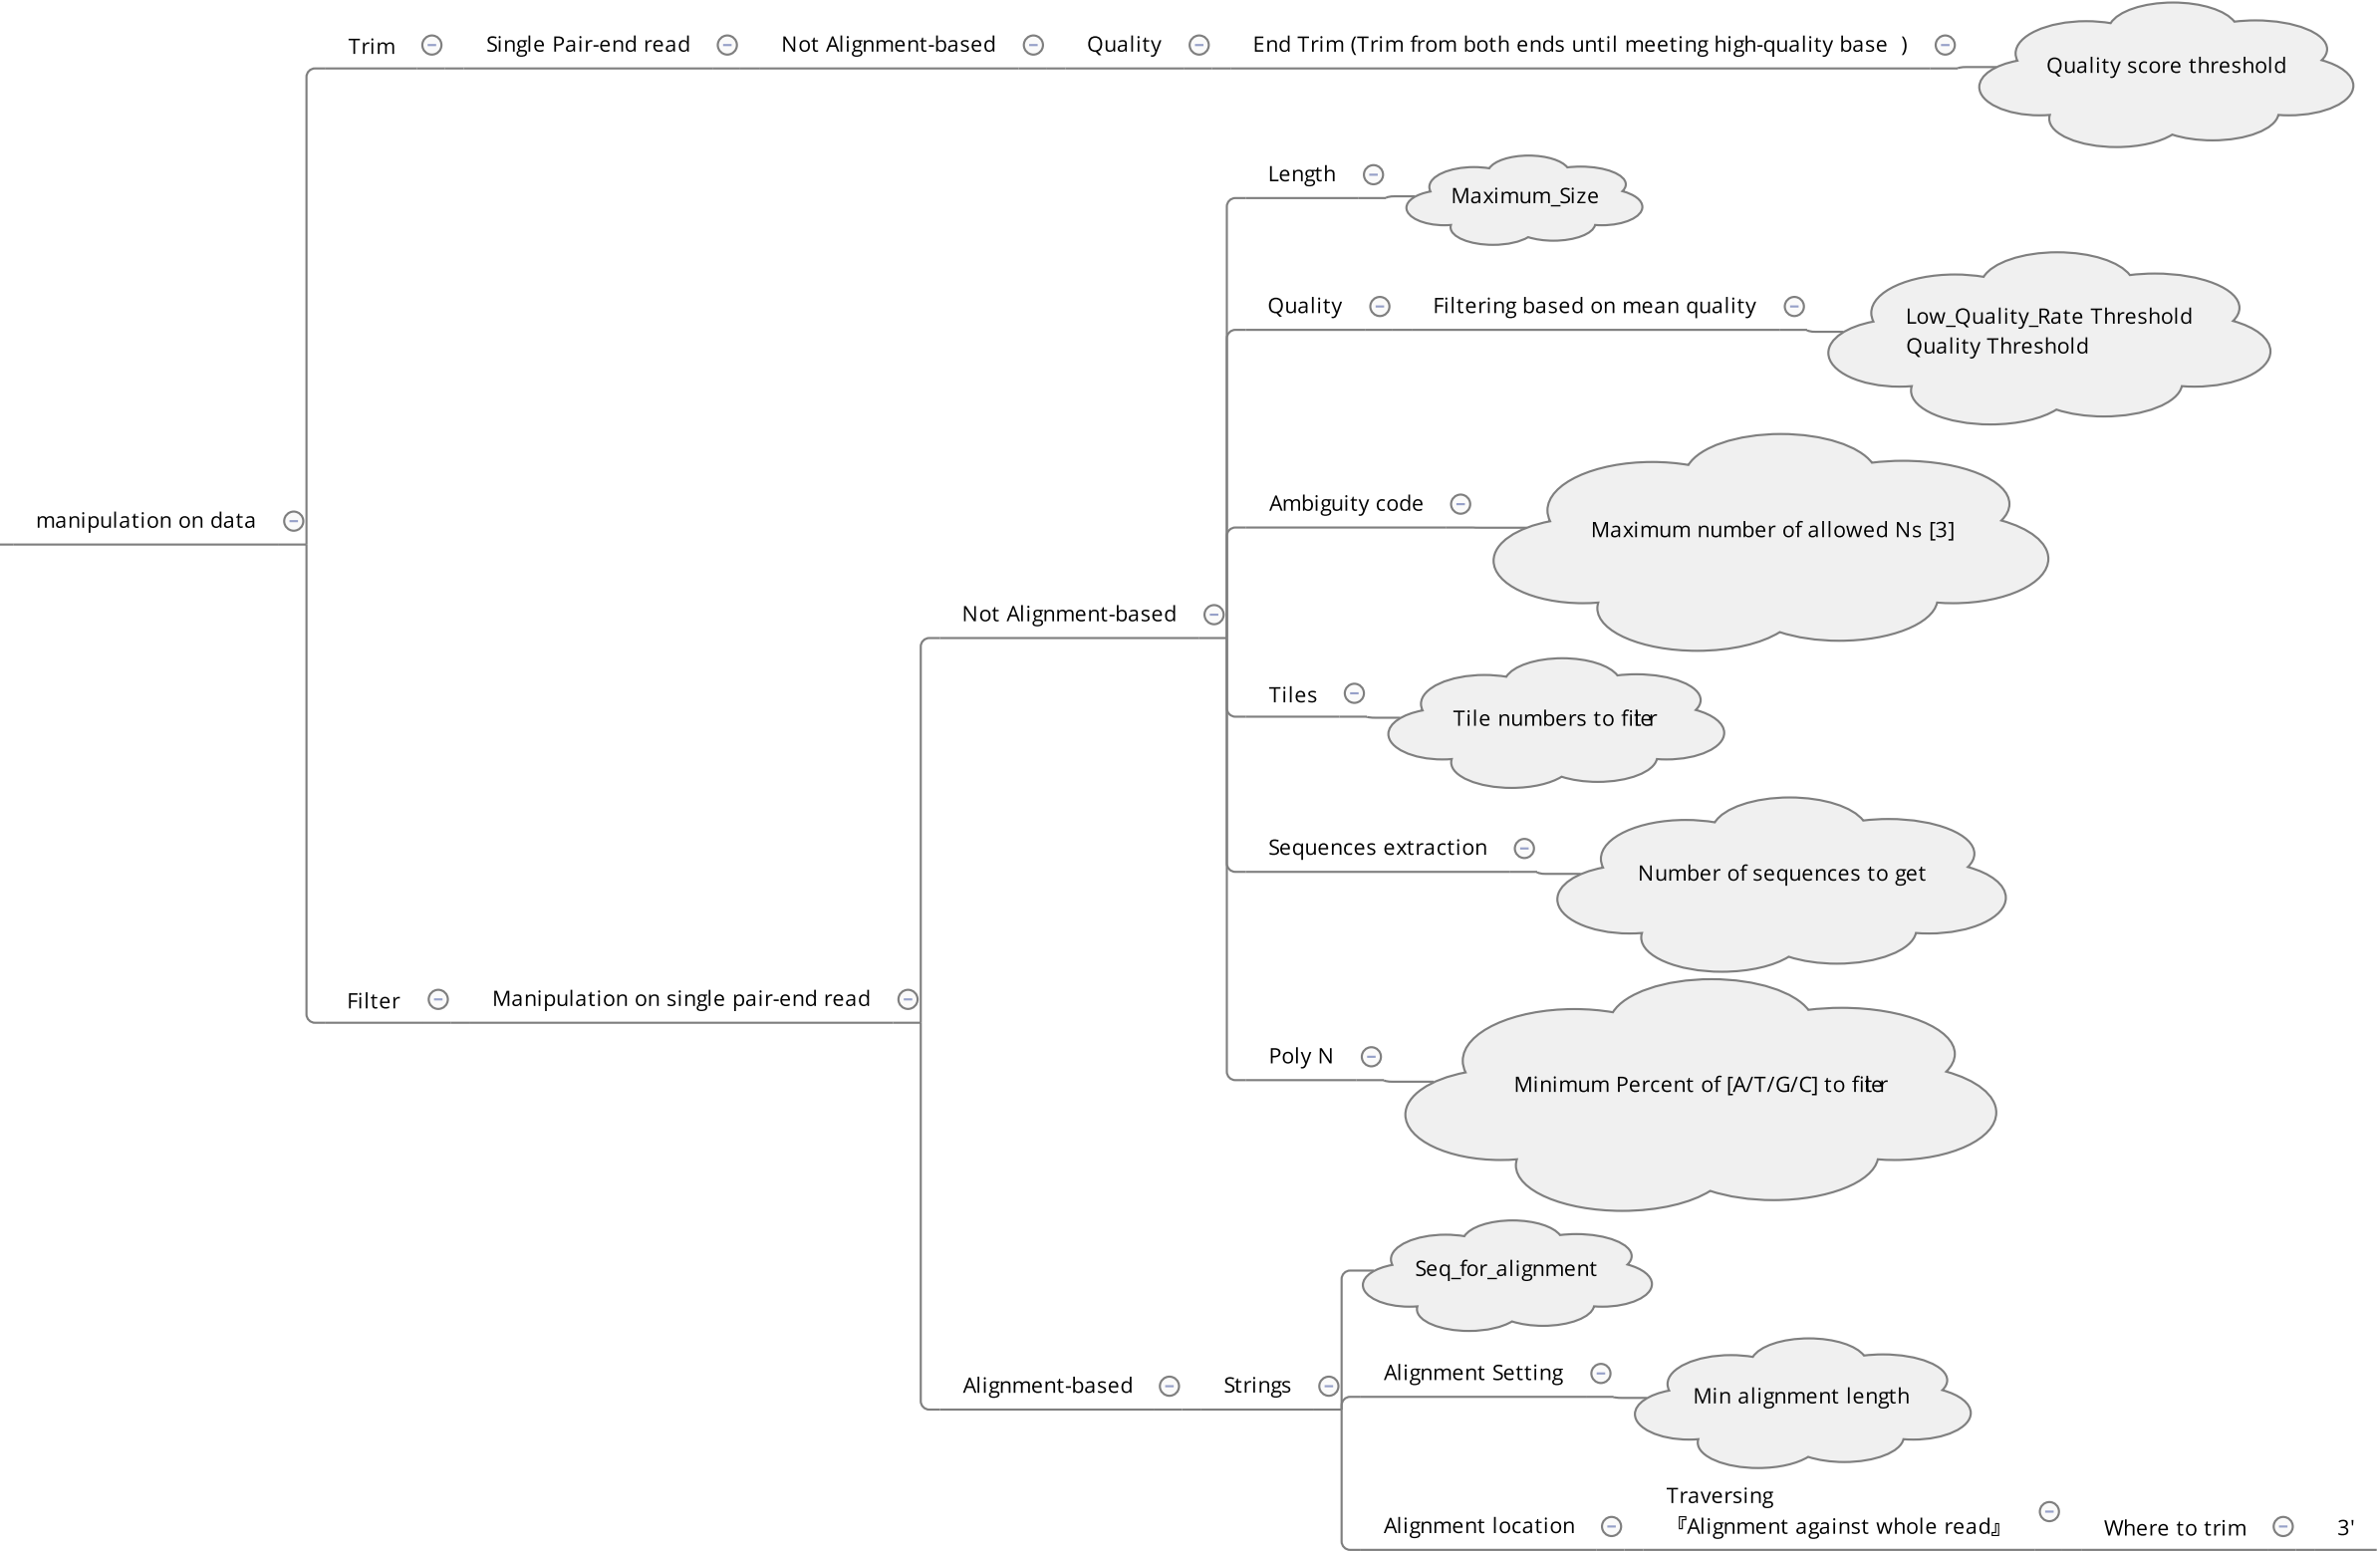

Supplement: gix120_supp.zip [file gix120_supp.zip]
